# Supplementary material
Source: PubMed Central journal article supplement (PMC6483002)

# Cancer stem cell-associated miRNAs serve as prognostic biomarkers in colorectal cancer

Shusuke Toden, Shigeyasu Kunitoshi, Jacob Cardenas, Jinghua Gu, Elizabeth Hutchins, Kendall Van Keuren-Jensen, Hiroyuki Uetake, Yuji Toiyama and Ajay Goel

## Supplementary Information

**Supplementary Fig 1: Chemoresistant cells express high levels of CD44v6** **A**, Schematics of chemoresistant cell generation. **B**, Images of 5-fluorouracil resistant (5FUR) cells compared to their respective parental cells. **C**, Cytotoxicity of 5FU on 5FUR cells in comparison to their parental cells (n = 6 per time point Mann-Whitney's U test). **D**, The expression of CD44 variants between 5FUR and parental cells (n=3, Mann-Whitney's U test). **E**, CD44v6 was consistently overexpressed between 5FUR and CDCSCs among all CD44 variants. **F**, Immunofluorescence images of CD44v6 (GFP, right) and DAPI nuclear staining (middle) and merged image (right) **G**, western blot of CD44v6 expression in HCT116/SW480 **H**, The expression of stemness-suppressive miRNAs between 5FUR cells and parental cells. \* p < 0.05, \*\* p < 0.01

**Supplementary Fig 2: Pathways associated with CD44v6 positive and negative cancer stem cells.** Pathway analysis of downstream target genes of differentially expressed miRNAs identified between CD44v6 positive and negative colorectal cancer stem cells.

**Supplementary Fig 3: Pathways associated with miRNAs downregulated in CD44v6 positive cancer stem cells.** **A**, Representation of pathways associated with downstream target genes of identified overexpressed miRNAs. Colored square represents pathways and colored circles are genes associated with the same colored square. **B**, Representation of pathways associated with downstream target genes of identified downregulated miRNAs. Colored square represents pathways and colored circles are genes associated with the same colored square.

**Supplementary Table 1.** Cohort characteristics

| Variable           |                | Cohort 1<br>No. (%) | Cohort 2<br>No. (%) |
|--------------------|----------------|---------------------|---------------------|
| Age                | Median (range) | 68 (32-92)          | 65 (35-90)          |
| Sex                | Female         | 47 (42)             | 41 (39)             |
|                    | Male           | 65 (58)             | 65 (61)             |
| Tumor location     | Colon          | 76 (68)             | 64 (60)             |
|                    | Rectum         | 36 (32)             | 42 (40)             |
|                    | I              | 21 (19)             | 22 (21)             |
|                    | II             | 32 (29)             | 39 (37)             |
|                    | III            | 29 (26)             | 18 (17)             |
|                    | IV             | 30 (27)             | 27 (25)             |
|                    | I              | 13 (12)             | 7 (7)               |
|                    | II             | 17 (15)             | 18 (17)             |
|                    | III            | 68 (61)             | 42 (40)             |
|                    | IV             | 14 (12)             | 39 (37)             |
| Histology          | Well and mod   | 70 (62)             | 99 (93)             |
|                    | Poor and muc   | 42 (38)             | 7 (7)               |
| Venous invasion    | Presence       | Cohort 2            | 90 (85)             |
|                    | Absence        | No. (%)             | 16 (150)            |
| Lymphatic invasion | Presence       | 68 (32-92)          | 60 (57)             |
|                    | Absence        | 47 (42)             | 46 (43)             |

**Supplementary Table 2:** Xenograft transplantation assay: HCT116 parental v. SDCSC comparison

| <b>Xenotransplantation assay*</b> |                           |                           |                           |
|-----------------------------------|---------------------------|---------------------------|---------------------------|
| <b>Cell No.</b>                   | <b>1 x 10<sup>5</sup></b> | <b>1 x 10<sup>4</sup></b> | <b>1 x 10<sup>3</sup></b> |
| <b>HCT116 parental</b>            | <b>6/6</b>                | <b>4/6</b>                | <b>1/6</b>                |
| <b>HCT116 SDCSC</b>               | <b>6/6</b>                | <b>6/6</b>                | <b>6/6</b>                |

\*Immunocompromised mice were injected with various numbers of SDCSCs or their parental cells and the number of mice that developed tumors counted

**Supplementary Table 3:** Xenograft transplantation assay: HCT116 SDCSC CD44v6<sup>-</sup> v. CD44v6<sup>+</sup> comparison

| <b>Xenotransplantation assay*</b> |                           |                           |
|-----------------------------------|---------------------------|---------------------------|
| <b>Cell No</b>                    | <b>1 x 10<sup>3</sup></b> | <b>1 x 10<sup>2</sup></b> |
| <b>SDCSC CD44v6<sup>-</sup></b>   | <b>0/4</b>                | <b>0/4</b>                |
| <b>SDCSC CD44v6<sup>+</sup></b>   | <b>4/4</b>                | <b>2/4</b>                |

\*Immunocompromised mice were injected with various numbers of CD44v6<sup>+</sup> SDCSCs and CD44v6<sup>-</sup> SDCSCs and the number of mice that developed tumors counted.

**Supplementary Table 4:** List of differentially expressed miRNAs between CD44v6 positive and negative spheroid derived cancer stem cells

| microRNA             | log2FoldChange | p-value  |
|----------------------|----------------|----------|
| <b>Upregulated</b>   |                |          |
| hsa-miR-1246         | 4.284343       | 2.07E-08 |
| hsa-miR-122-5p       | 5.142072       | 1.80E-07 |
| hsa-miR-3605-3p      | 3.699013       | 4.29E-06 |
| hsa-miR-423-5p       | 3.173          | 0.000179 |
| hsa-miR-3182         | 3.600355       | 0.000192 |
| hsa-miR-4284         | 4.153804       | 0.000231 |
| hsa-miR-338-3p       | 2.773659       | 0.020168 |
| hsa-miR-2116-3p      | 2.288411       | 0.03215  |
| hsa-miR-3609         | 2.449211       | 0.038835 |
| hsa-miR-320b         | 1.932736       | 0.039924 |
| <b>Downregulated</b> |                |          |
| hsa-miR-31-3p        | -3.91411       | 1.70E-05 |
| hsa-miR-19a-3p       | -3.29285       | 5.60E-05 |
| hsa-miR-29b-3p       | -3.43576       | 0.000144 |
| hsa-miR-19b-3p       | -3.18754       | 0.000231 |
| hsa-miR-21-3p        | -2.81419       | 0.000257 |
| hsa-miR-374a-5p      | -3.10058       | 0.000257 |
| hsa-miR-340-5p       | -3.03188       | 0.00027  |
| hsa-miR-18a-5p       | -2.80731       | 0.000795 |
| hsa-miR-374a-3p      | -2.69516       | 0.001777 |
| hsa-miR-101-3p       | -2.61788       | 0.002071 |
| hsa-miR-561-5p       | -2.61604       | 0.002427 |
| hsa-miR-106b-5p      | -2.44869       | 0.002903 |
| hsa-miR-100-3p       | -2.39362       | 0.008258 |
| hsa-miR-20a-5p       | -2.87515       | 0.008258 |
| hsa-miR-590-3p       | -2.63081       | 0.008301 |
| hsa-miR-141-3p       | -2.36889       | 0.013367 |
| hsa-miR-153-3p       | -2.57055       | 0.013721 |
| hsa-miR-30b-5p       | -2.33372       | 0.013721 |
| hsa-miR-30e-5p       | -2.10295       | 0.015321 |
| hsa-miR-660-5p       | -2.3817        | 0.016878 |
| hsa-miR-429          | -2.05656       | 0.018854 |
| hsa-miR-1307-5p      | -2.34819       | 0.019584 |
| hsa-miR-141-5p       | -2.06997       | 0.020168 |
| hsa-miR-15b-3p       | -2.56947       | 0.021944 |
| hsa-miR-140-5p       | -2.51024       | 0.026942 |
| hsa-miR-34a-3p       | -3.158         | 0.028502 |
| hsa-miR-7-5p         | -1.96159       | 0.034788 |
| hsa-miR-577          | -1.99848       | 0.034948 |
| hsa-let-7f-1-3p      | -2.23188       | 0.039924 |
| hsa-miR-17-5p        | -2.16379       | 0.04355  |
| hsa-miR-7-1-3p       | -1.98415       | 0.04355  |
| hsa-miR-200a-3p      | -1.94489       | 0.048989 |

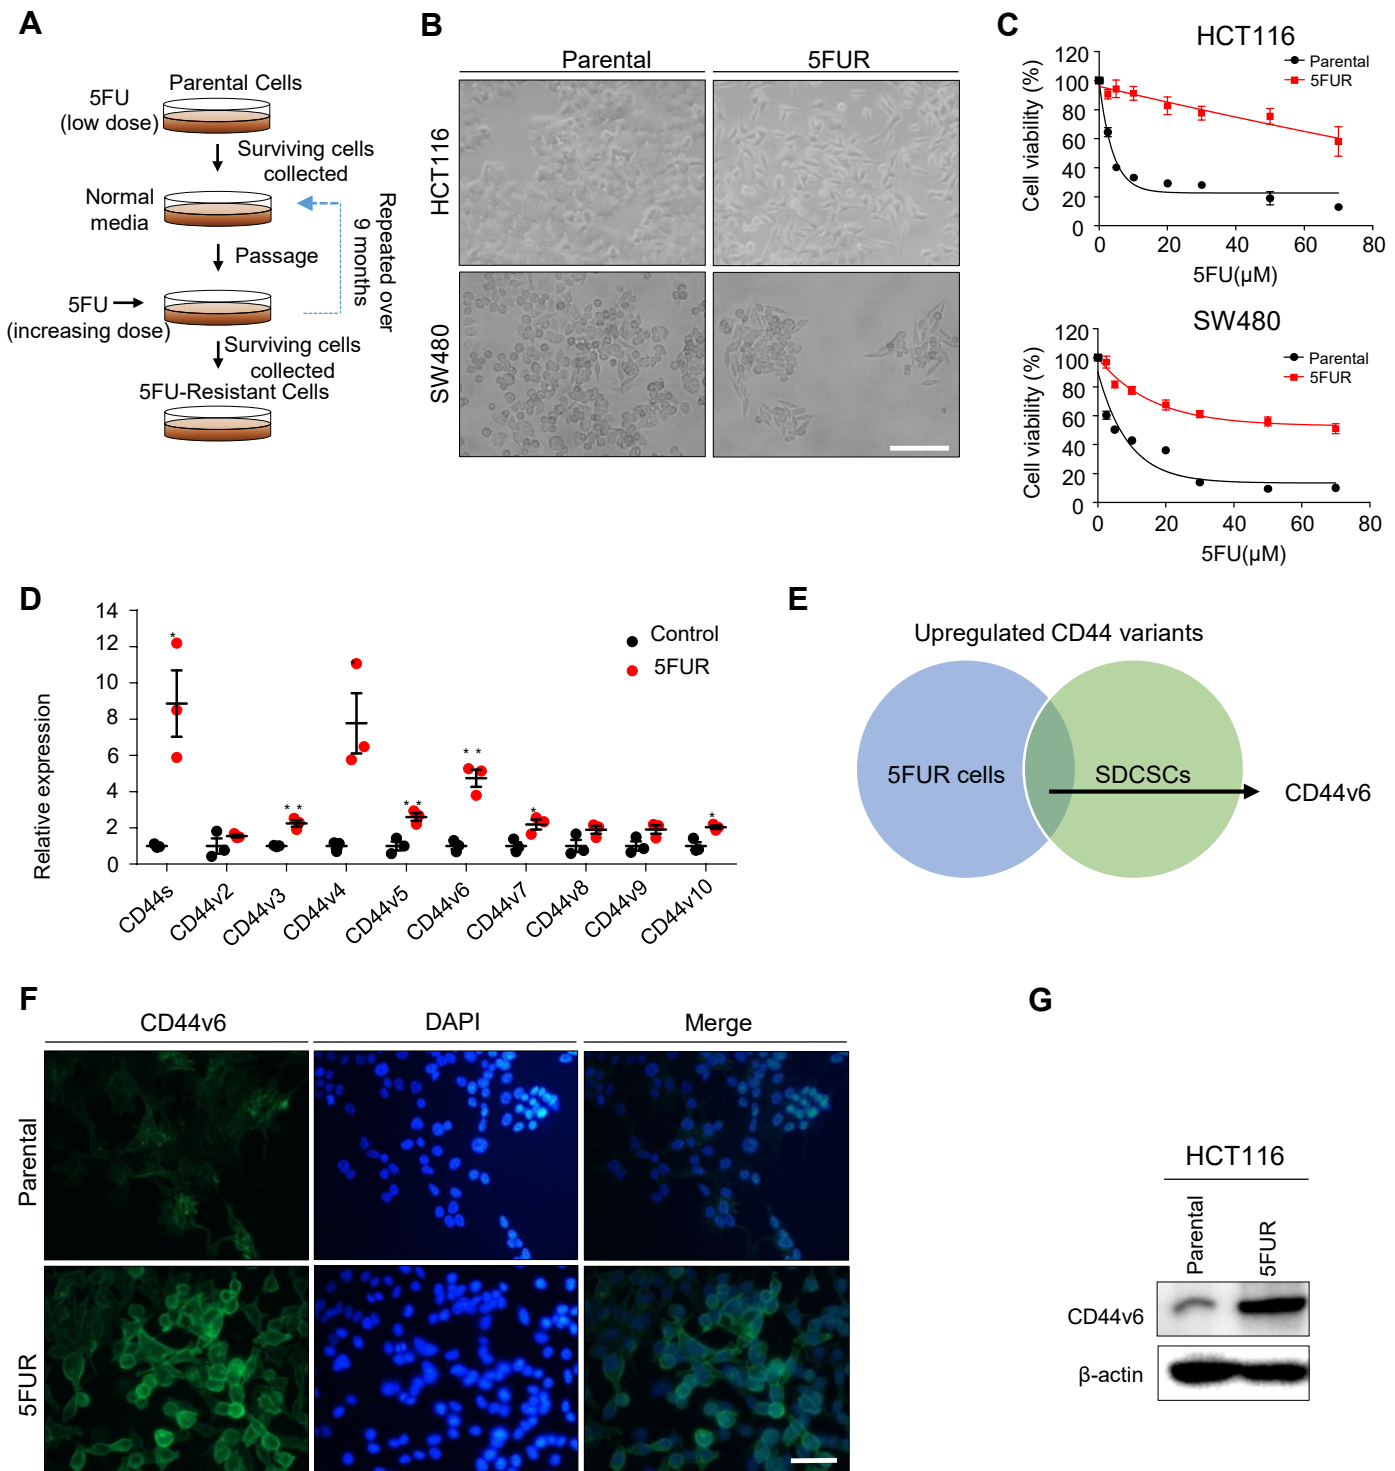

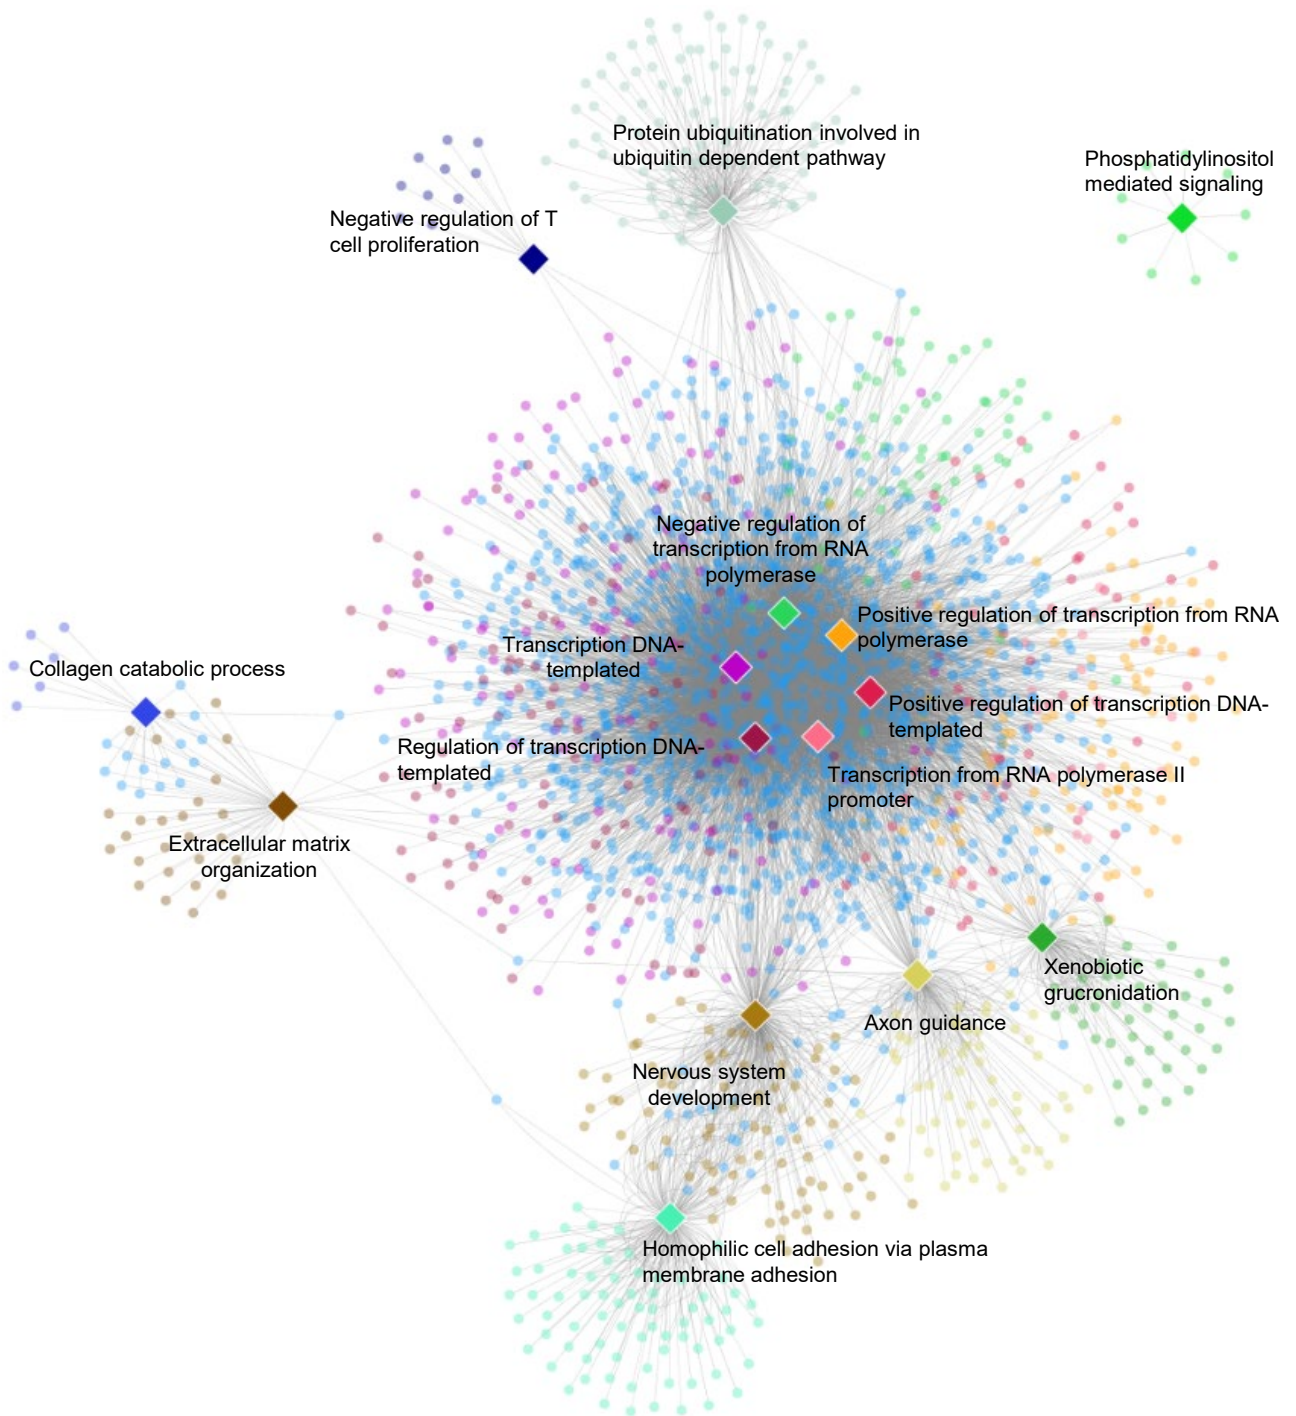

A

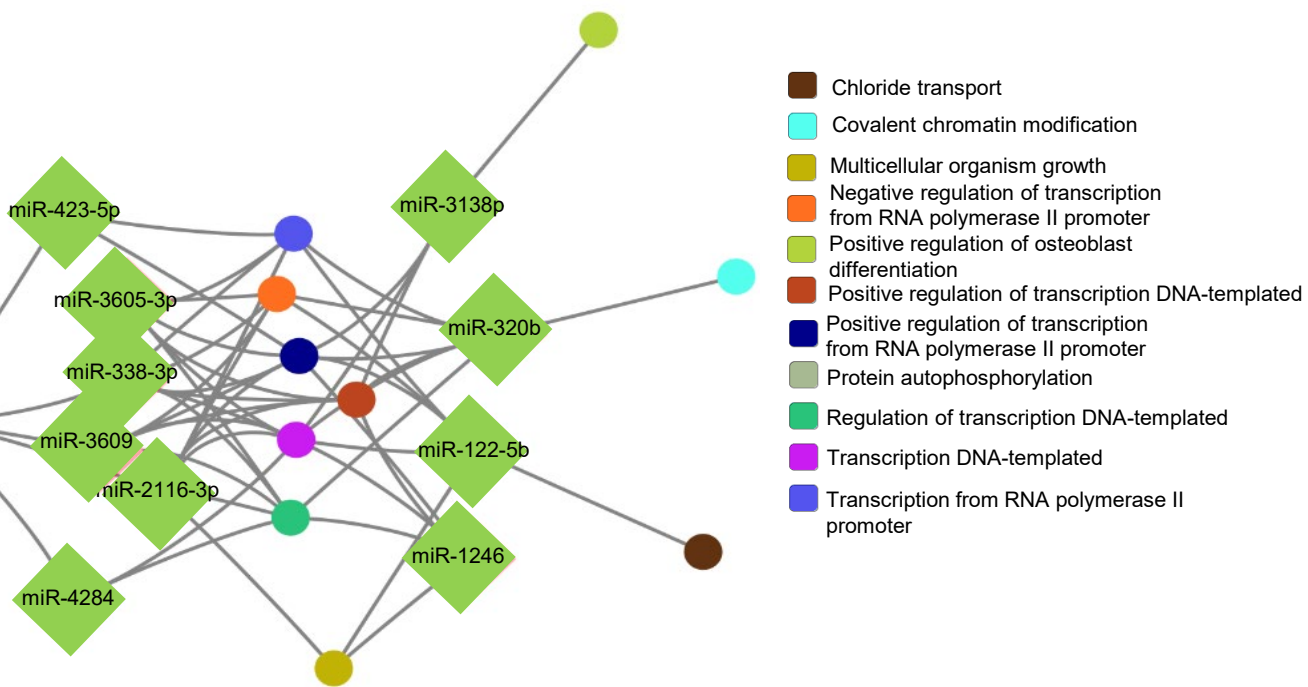

B

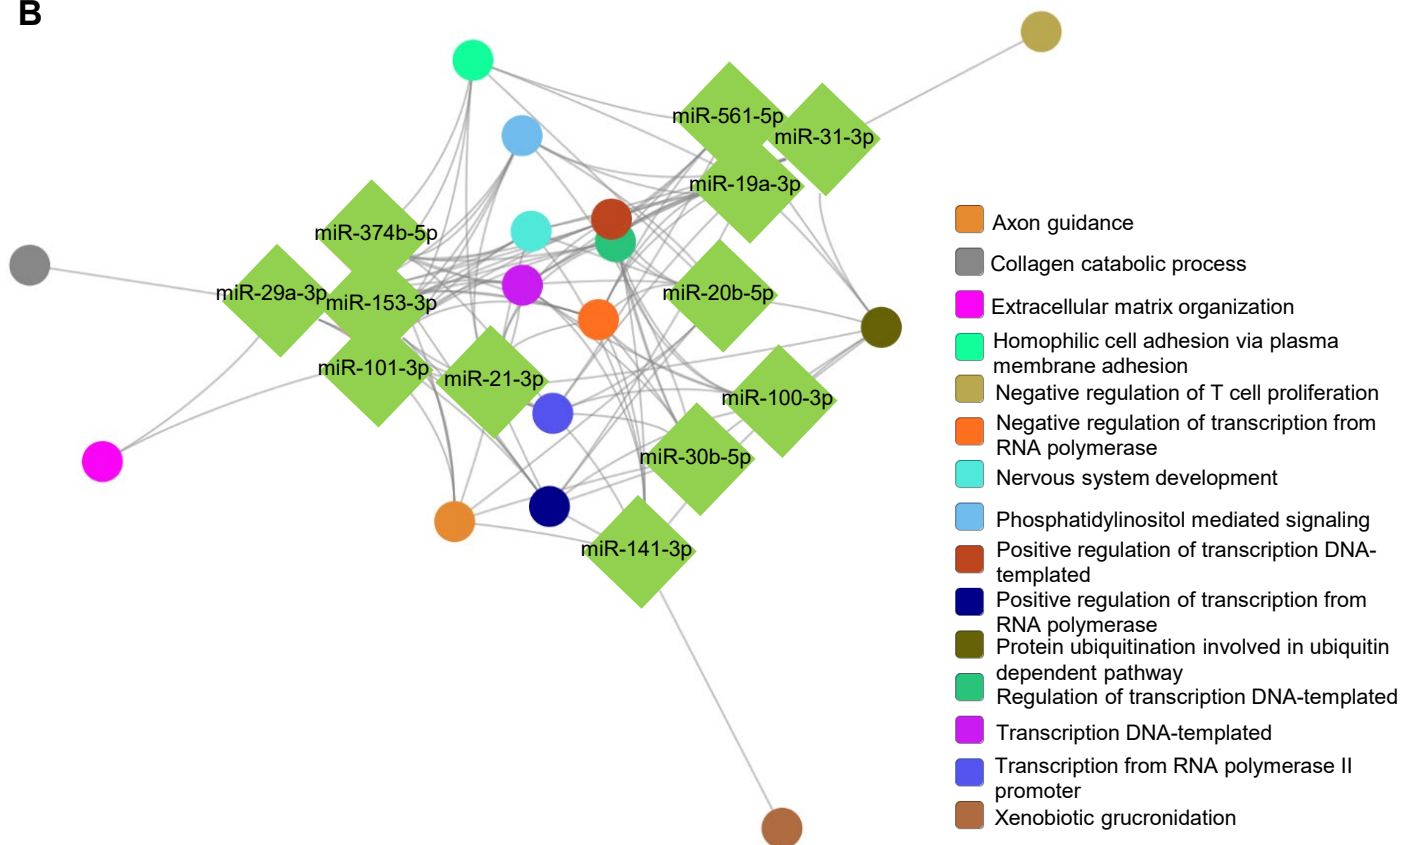

Supplement: jciinsight-4-125294-s025.pdf [file jciinsight-4-125294-s025.pdf]
